# Supplementary material for: Wet–dry cycles impact DOM retention in subsurface soils
Source: Copernicus journal article supplement (doi:10.5194/bg-15-821-2018), 2018-02-09
Supplement: Supplementary file 1 [file bg-15-821-2018-supplement.pdf]

Supplement of Biogeosciences, 15, 821–832, 2018  
<https://doi.org/10.5194/bg-15-821-2018-supplement>  
© Author(s) 2018. This work is distributed under  
the Creative Commons Attribution 4.0 License.

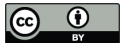

*Supplement of*

## **Wet–dry cycles impact DOM retention in subsurface soils**

**Yaniv Olshansky et al.**

*Correspondence to:* Yaniv Olshansky ([yanivo@email.arizona.edu](mailto:yanivo@email.arizona.edu))

The copyright of individual parts of the supplement might differ from the CC BY 4.0 License.

**Table S1. Quantitative XRD analysis for JRB and SCM soils**

|                  | JRB  | SCM   |
|------------------|------|-------|
| <b>NON-CLAYS</b> | %    | %     |
| Quartz           | 24.1 | 28.38 |
| Kspar            | 12.1 |       |
| Oligoclase       | 14.2 |       |
| Goethite         | 4.3  | 1.60  |
| Albite           |      | 19.84 |
| Gibbsite         |      | 2.48  |
| Orthoclase       |      | 18.61 |
| <b>CLAYS</b>     |      |       |
| Kaolinite        | 6.5  | 5.79  |
| Illite           | 23.7 |       |
| Illite-Smectite  | 11.8 | 15.54 |
| Vermiculite      | 3.3  |       |
| Chlorite         |      | 4.55  |
| Biotite          |      | 3.21  |

**5 Table S2. Major cations in JRB and SCM soil extract and DOM**

|                          | JRB               | SCM       | JRB        | SCM       |
|--------------------------|-------------------|-----------|------------|-----------|
|                          | Soil extract 1:10 |           | DOM        |           |
| Na (mg L <sup>-1</sup> ) | 0.8 ± 0.1         | 0.8 ± 0.1 | 0.6 ± 0.1  | 0.5 ± 0.1 |
| K (mg L <sup>-1</sup> )  | 4.9 ± 2.0         | 1.5 ± 0.4 | 1.7 ± 0.4  | 1.1 ± 0.2 |
| Ca (mg L <sup>-1</sup> ) | 3.1 ± 1.2         | 2.2 ± 0.4 | 10.7 ± 3.4 | 9.0 ± 1.8 |
| Mg (mg L <sup>-1</sup> ) | 0.5 ± 0.1         | 0.5 ± 0.1 | 17.3 ± 3.3 | 6.8 ± 0.8 |

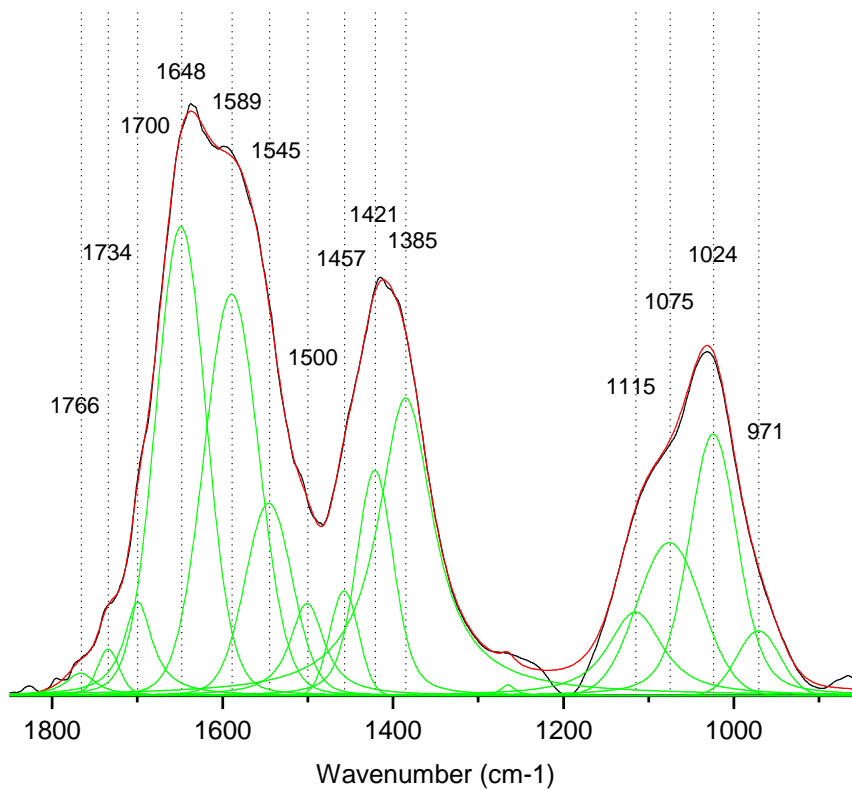

**Figure S1: Transmission FTIR spectra of the unreacted JRB DOM dried solution. Original spectra (black line), fitted spectra (red line), deconvoluted peaks (green lines).**

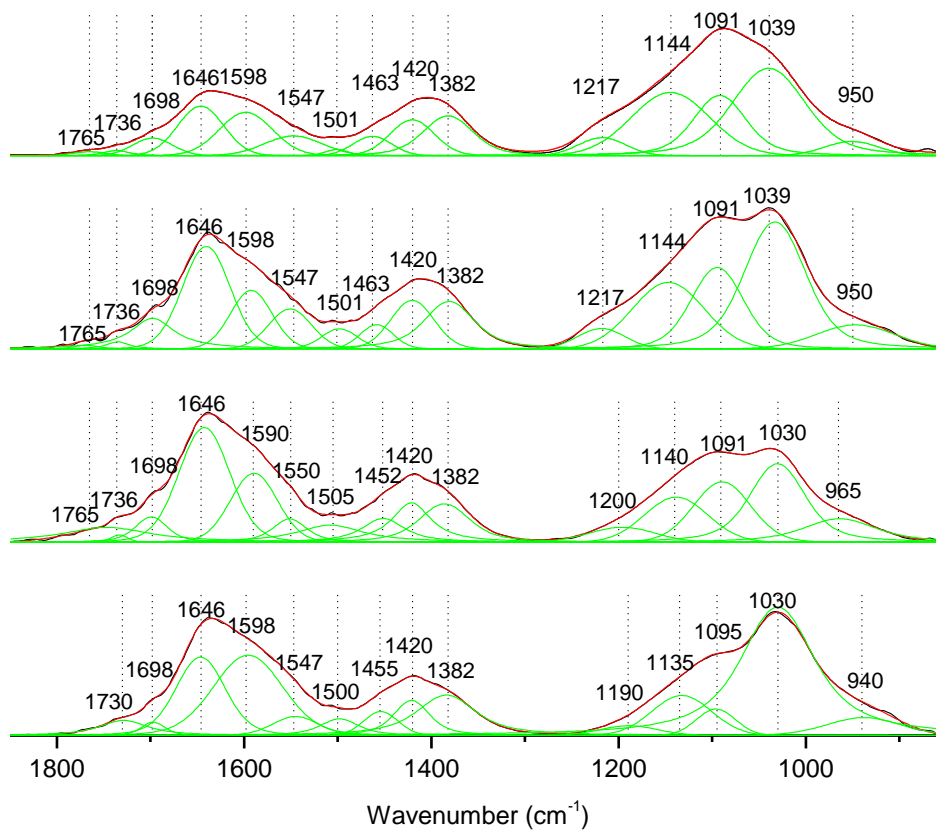

5 Figure S2: Transmission FTIR spectra of the wet-dry reacted JRB DOM dried solution, 1 to 4 reaction steps from top to bottom. Original spectra (black line), fitted spectra (red line), deconvoluted peaks (green lines).

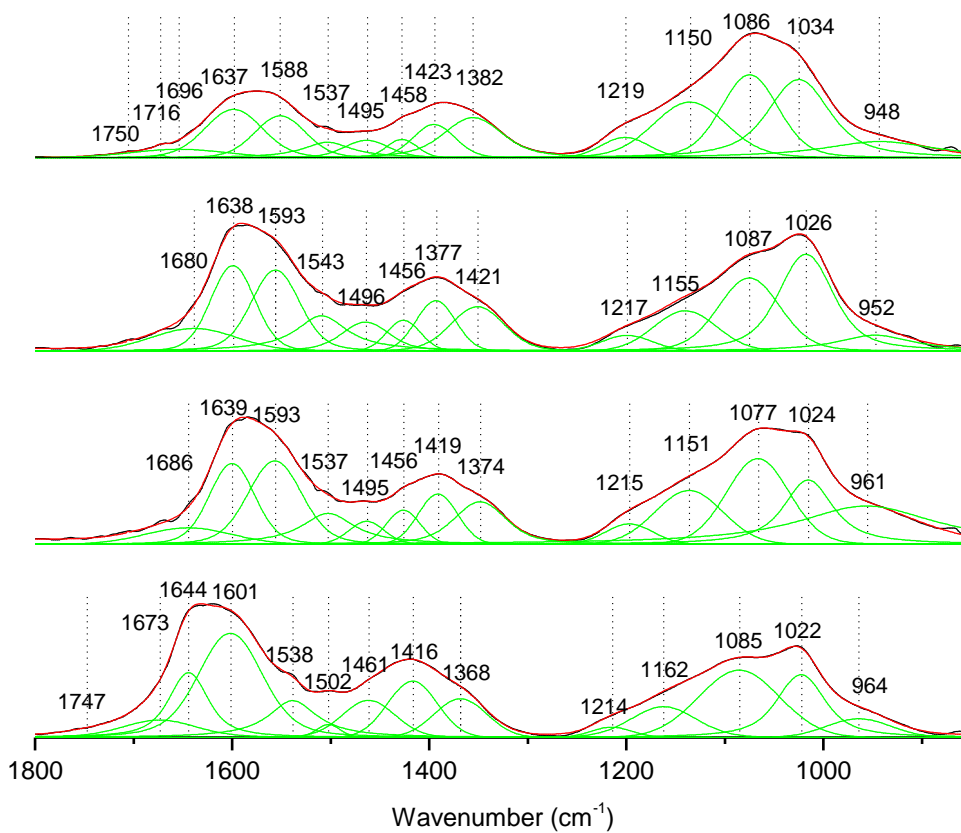

5 **Figure S3: Transmission FTIR spectra of the continually wet reacted JRB DOM dried solution, 1 to 4 reaction steps from top to bottom. Original spectra (black line), fitted spectra (red line), deconvoluted peaks (green lines).**

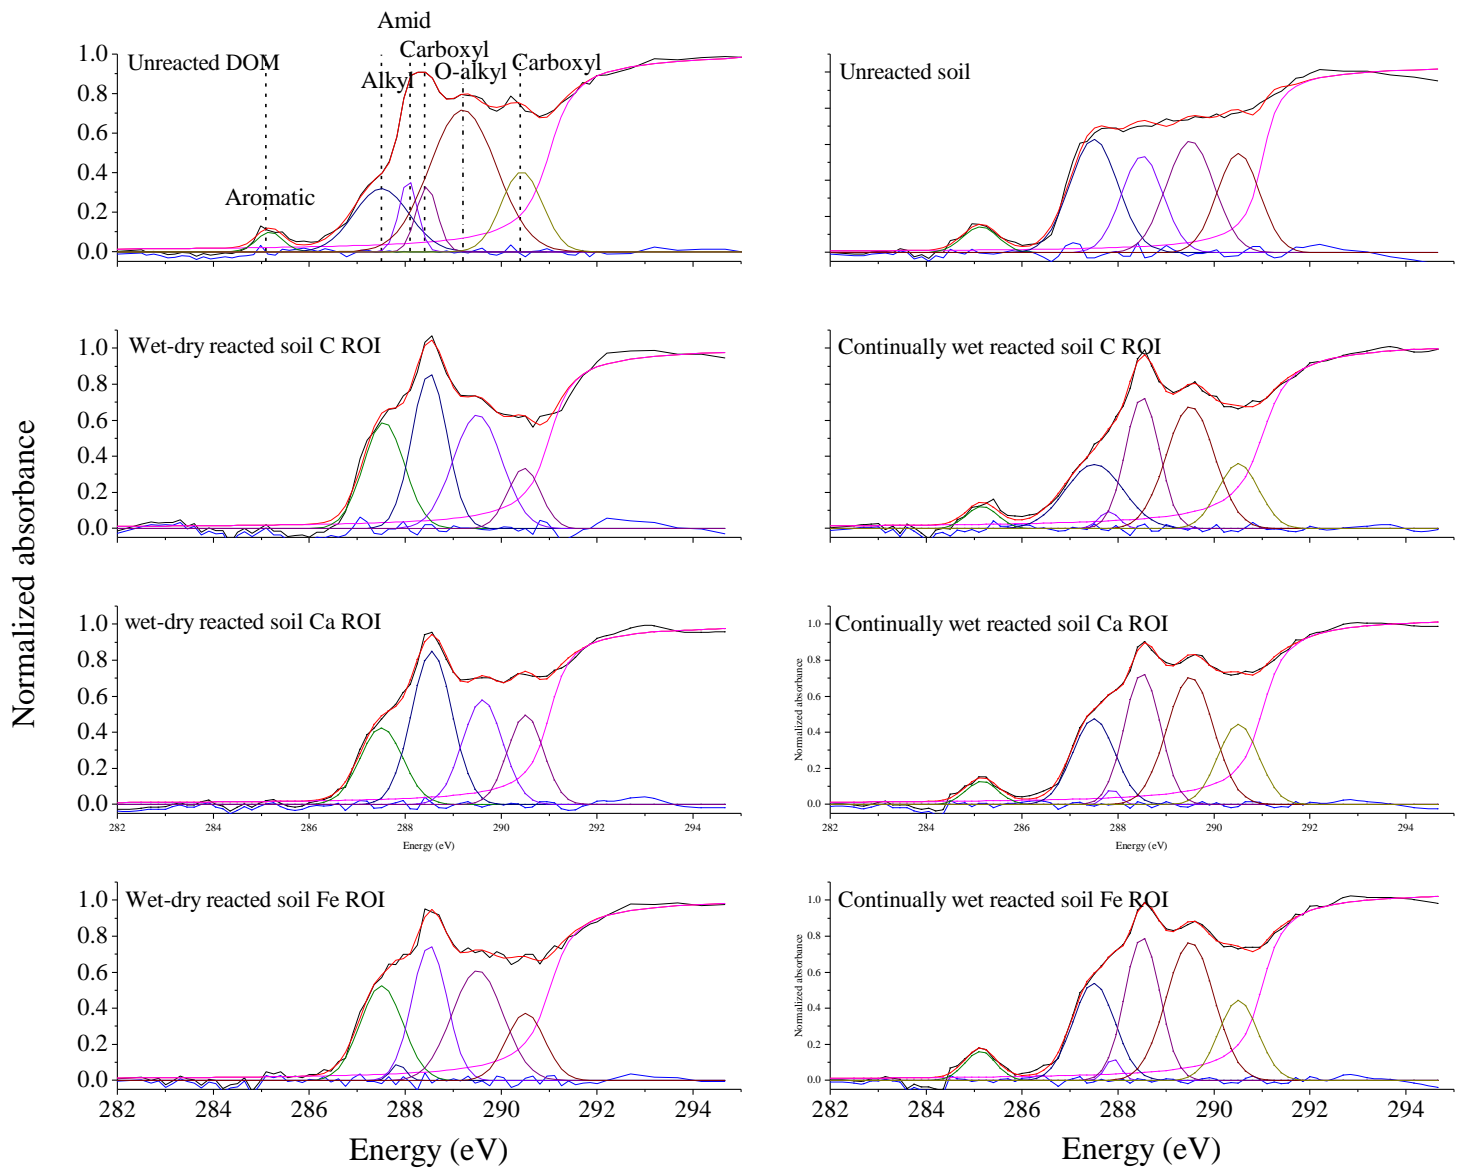

**Figure S4: Fitted NEXAFS spectra. Original spectra (black line), fitted spectra (red line), arctangent step (magenta line), deconvoluted peaks (multiple colors lines) and residual (blue line).**
